# Supplementary material for: Incidence of Human and Free-Ranging Wild Rodent Infections with Leishmania (Viannia) braziliensis, Aetiological Agent of Cutaneous Leishmaniasis
Source: MDPI journal article supplement (doi:10.3390/pathogens12121395), 2023-11-28
Supplement: s1 [file s1]

**Table S1.** Leishmania Skin Test (LST) and American Cutaneous Leishmaniasis scar (ACL) status, age, sex, and residence in study foci of human participants.

| local   | exposure  |       | LST | ACL scar | sex |
|---------|-----------|-------|-----|----------|-----|
|         | age (yrs) | (yrs) |     |          |     |
| Amaraji | 40        | 40    | 1   | 1        | 1   |
| Amaraji | 44        | 44    | 0   | 0        | 2   |
| Amaraji | 8         | 8     | 0   | 0        | 1   |
| Amaraji | 11        | 11    | 1   | 0        | 2   |
| Amaraji | 34        | 24    | 0   | 0        | 2   |
| Amaraji | 6         | 6     | 0   | 0        | 2   |
| Amaraji | 8         | 8     | 0   | 0        | 1   |
| Amaraji | 58        | 27    | 1   | 1        | 2   |
| Amaraji | 17        | 15    | 0   | 0        | 1   |
| Amaraji | 14        | 1     | 0   | 0        | 1   |
| Amaraji | 13        | 13    | 0   | 0        | 2   |
| Amaraji | 14        | 14    | 0   | 0        | 1   |
| Amaraji | 26        | 26    | 1   | 0        | 2   |
| Amaraji | 15        | 15    | 0   | 0        | 2   |
| Amaraji | 62        | 29    | 1   | 1        | 2   |
| Amaraji | 28        | 13    | 0   | 0        | 1   |
| Amaraji | 38        | 11    | 0   | 0        | 2   |
| Amaraji | 39        | 28    | 1   | 1        | 2   |
| Amaraji | 12        | 12    | 0   | 0        | 2   |
| Amaraji | 26        | 25    | 1   | 0        | 1   |
| Amaraji | 6         | 6     | 0   | 0        | 2   |
| Amaraji | 32        | 32    | 0   | 0        | 2   |
| Amaraji | 8         | 8     | 0   | 0        | 2   |
| Amaraji | 37        | 20    | 0   | 0        | 2   |
| Amaraji | 41        | 19    | 1   | 1        | 1   |
| Amaraji | 57        | 19    | 1   | 0        | 2   |
| Amaraji | 6         | 6     | 0   | 0        | 1   |
| Amaraji | 23        | 19    | 0   | 0        | 1   |
| Amaraji | 58        | 50    | 1   | 0        | 2   |
| Amaraji | 37        | 32    | 1   | 0        | 2   |
| Amaraji | 21        | 12    | 0   | 0        | 1   |
| Amaraji | 37        | 18    | 0   | 0        | 2   |
| Amaraji | 15        | 15    | 0   | 0        | 1   |
| Amaraji | 18        | 18    | 0   | 0        | 1   |
| Amaraji | 24        | 4     | 0   | 0        | 1   |
| Amaraji | 34        | 12    | 0   | 0        | 2   |
| Amaraji | 10        | 1     | 0   | 0        | 1   |
| Amaraji | 17        | 13    | 0   | 0        | 1   |
| Amaraji | 49        | 22    | 1   | 1        | 1   |
| Amaraji | 14        | 14    | 0   | 0        | 2   |
| Amaraji | 17        | 17    | 1   | 1        | 1   |
| Amaraji | 25        | 25    | 1   | 1        | 1   |
| Amaraji | 49        | 20    | 0   | 0        | 2   |
| Amaraji | 43        | 20    | 1   | 0        | 1   |
| Amaraji | 27        | 22    | 0   | 0        | 2   |
| Amaraji | 29        | 29    | 0   | 0        | 1   |
| Amaraji | 67        | 26    | 1   | 1        | 2   |

|         |    |    |   |   |   |
|---------|----|----|---|---|---|
| Amaraji | 13 | 13 | 1 | 1 | 2 |
| Amaraji | 24 | 18 | 1 | 0 | 2 |
| Amaraji | 34 | 15 | 1 | 1 | 2 |
| Amaraji | 16 | 16 | 0 | 0 | 2 |
| Amaraji | 35 | 35 | 0 | 0 | 2 |
| Amaraji | 8  | 8  | 0 | 0 | 2 |
| Amaraji | 43 | 43 | 0 | 0 | 1 |
| Amaraji | 12 | 12 | 1 | 0 | 2 |
| Amaraji | 38 | 8  | 0 | 0 | 2 |
| Amaraji | 14 | 7  | 0 | 0 | 1 |
| Amaraji | 6  | 6  | 0 | 0 | 2 |
| Amaraji | 19 | 14 | 0 | 0 | 1 |
| Amaraji | 23 | 23 | 1 | 1 | 2 |
| Amaraji | 39 | 10 | 0 | 0 | 2 |
| Amaraji | 34 | 2  | 0 | 0 | 2 |
| Amaraji | 45 | 38 | 1 | 1 | 1 |
| Amaraji | 5  | 5  | 1 | 1 | 2 |
| Amaraji | 9  | 9  | 0 | 0 | 2 |
| Amaraji | 2  | 2  | 0 | 0 | 2 |
| Amaraji | 56 | 30 | 1 | 1 | 1 |
| Amaraji | 5  | 5  | 0 | 0 | 1 |
| Amaraji | 21 | 16 | 0 | 0 | 1 |
| Amaraji | 16 | 2  | 0 | 0 | 1 |
| Moreno  | 61 | 16 | 1 | 0 | 2 |
| Moreno  | 10 | 10 | 0 | 0 | 1 |
| Moreno  | 33 | 15 | 0 | 0 | 1 |
| Moreno  | 4  | 4  | 0 | 0 | 2 |
| Moreno  | 51 | 15 | 0 | 0 | 1 |
| Moreno  | 1  | 1  | 0 | 0 | 2 |
| Moreno  | 28 | 28 | 0 | 0 | 2 |
| Moreno  | 9  | 9  | 0 | 0 | 1 |
| Moreno  | 4  | 4  | 0 | 0 | 2 |
| Moreno  | 31 | 31 | 0 | 0 | 1 |
| Moreno  | 5  | 5  | 0 | 0 | 1 |
| Moreno  | 58 | 58 | 0 | 0 | 1 |
| Moreno  | 2  | 2  | 0 | 0 | 1 |
| Moreno  | 20 | 20 | 0 | 0 | 1 |
| Moreno  | 6  | 6  | 0 | 0 | 2 |
| Moreno  | 9  | 9  | 0 | 0 | 1 |
| Moreno  | 10 | 10 | 1 | 1 | 1 |
| Moreno  | 16 | 16 | 0 | 0 | 2 |
| Moreno  | 6  | 6  | 0 | 0 | 1 |
| Moreno  | 62 | 52 | 0 | 0 | 2 |
| Moreno  | 8  | 8  | 0 | 0 | 2 |
| Moreno  | 14 | 14 | 0 | 0 | 1 |
| Moreno  | 10 | 10 | 0 | 0 | 2 |
| Moreno  | 66 | 15 | 1 | 1 | 1 |
| Moreno  | 32 | 4  | 0 | 0 | 1 |
| Moreno  | 14 | 14 | 0 | 0 | 2 |
| Moreno  | 14 | 14 | 1 | 1 | 1 |

|        |    |    |   |   |   |
|--------|----|----|---|---|---|
| Moreno | 14 | 14 |   | 0 | 2 |
| Moreno | 15 | 7  |   | 0 | 2 |
| Moreno | 8  | 8  | 0 | 0 | 1 |
| Moreno | 40 | 13 | 0 | 0 | 1 |
| Moreno | 14 | 14 |   | 0 | 2 |
| Moreno | 42 | 42 | 1 | 0 | 1 |
| Moreno | 13 | 13 | 0 | 0 | 2 |
| Moreno | 14 | 14 | 1 | 1 | 1 |
| Moreno | 12 | 12 | 0 | 0 | 1 |
| Moreno | 32 | 10 | 1 | 0 | 1 |
| Moreno | 36 | 1  | 0 | 0 | 2 |
| Moreno | 16 | 9  | 0 | 0 | 1 |
| Moreno | 42 | 42 | 0 | 0 | 1 |
| Moreno | 5  | 5  | 0 | 0 | 2 |
| Moreno | 10 | 10 | 0 | 0 | 2 |
| Moreno | 14 | 6  | 0 | 0 | 2 |
| Moreno | 30 | 6  | 1 | 0 | 1 |
| Moreno | 2  | 2  | 0 | 0 | 2 |
| Moreno | 28 | 15 | 1 | 0 | 1 |
| Moreno | 12 | 12 | 0 | 0 | 1 |
| Moreno | 11 | 11 | 0 | 0 | 1 |
| Moreno | 42 | 15 | 1 | 1 | 1 |
| Moreno | 41 | 15 | 1 | 0 | 2 |
| Moreno | 31 | 15 | 1 | 1 | 1 |
| Moreno | 54 | 14 | 0 | 0 | 1 |
| Moreno | 12 | 12 | 0 | 0 | 2 |
| Moreno | 10 | 10 | 0 | 0 | 2 |
| Moreno | 7  | 7  | 0 | 0 | 2 |
| Moreno | 6  | 6  | 0 | 0 | 1 |
| Moreno | 14 | 14 | 0 | 0 | 1 |
| Moreno | 35 | 17 | 1 | 1 | 2 |
| Moreno | 43 | 15 | 0 | 0 | 1 |
| Moreno | 3  | 1  | 0 | 0 | 2 |
| Moreno | 23 | 2  | 0 | 0 | 1 |
| Moreno | 52 | 12 | 1 | 0 | 1 |
| Moreno | 13 | 13 | 0 | 0 | 1 |
| Moreno | 43 | 3  |   | 0 | 1 |
| Moreno | 9  | 5  | 1 | 0 | 1 |
| Moreno | 29 | 17 | 0 | 0 | 1 |
| Moreno | 54 | 20 | 1 | 1 | 1 |
| Moreno | 56 | 56 | 0 | 0 | 2 |
| Moreno | 45 | 10 | 0 | 0 | 2 |
| Moreno | 38 | 10 | 1 | 0 | 1 |
| Moreno | 16 | 7  | 1 | 0 | 1 |
| Moreno | 18 | 7  | 1 | 0 | 1 |
| Moreno | 3  | 3  | 0 | 0 | 2 |
| Moreno | 24 | 7  | 0 | 0 | 1 |
| Moreno | 9  | 9  | 1 | 0 | 2 |
| Moreno | 14 | 10 | 0 | 0 | 2 |
| Moreno | 6  | 6  | 0 | 0 | 1 |

|        |    |    |   |   |   |
|--------|----|----|---|---|---|
| Moreno | 3  | 3  | 0 | 0 | 2 |
| Moreno | 2  | 2  | 0 | 0 | 2 |
| Moreno | 22 | 7  | 0 | 0 | 1 |
| Moreno | 48 | 48 | 1 | 0 | 1 |
| Moreno | 28 | 7  | 1 | 1 | 1 |
| Moreno | 5  | 5  | 1 | 0 | 1 |
| Moreno | 10 | 10 | 0 | 0 | 2 |
| Moreno | 5  | 5  | 0 | 0 | 2 |
| Moreno | 30 | 30 | 0 | 0 | 2 |
| Moreno | 11 | 11 | 0 | 0 | 2 |
| Moreno | 13 | 13 | 1 | 0 | 1 |
| Moreno | 12 | 12 | 0 | 0 | 1 |
| Moreno | 14 | 14 |   | 0 | 1 |
| Moreno | 54 | 54 | 0 | 0 | 2 |
| Moreno | 12 | 12 | 0 | 0 | 1 |
| Moreno | 49 | 17 | 0 | 0 | 2 |
| Moreno | 8  | 8  | 0 | 0 | 1 |
| Moreno | 11 | 11 | 1 | 0 | 2 |
| Moreno | 36 | 17 | 0 | 0 | 1 |
| Moreno | 9  | 9  | 0 | 0 | 1 |
| Moreno | 11 | 11 | 0 | 0 | 1 |
| Moreno | 39 | 39 | 1 | 1 | 1 |
| Moreno | 54 | 17 | 0 | 0 | 2 |
| Moreno | 61 | 15 | 0 | 0 | 1 |
| Moreno | 13 | 13 | 1 | 0 | 2 |
| Moreno | 11 | 11 | 0 | 0 | 2 |
| Moreno | 60 | 17 | 1 | 0 | 2 |
| Moreno | 51 | 17 | 1 | 1 | 2 |
| Moreno | 16 | 16 | 0 | 0 | 1 |
| Moreno | 13 | 13 | 0 | 0 | 2 |
| Moreno | 16 | 16 | 0 | 0 | 1 |
| Moreno | 45 | 29 | 0 | 0 | 1 |
| Moreno | 59 | 13 | 1 | 0 | 2 |
| Moreno | 19 | 1  | 1 | 0 | 1 |
| Moreno | 14 | 14 | 0 | 0 | 1 |
| Moreno | 10 | 10 | 0 | 0 | 2 |
| Moreno | 3  | 3  | 0 | 0 | 1 |
| Moreno | 29 | 29 | 0 | 0 | 1 |
| Moreno | 22 | 7  | 1 | 0 | 1 |
| Moreno | 5  | 5  | 1 | 0 | 2 |
| Moreno | 52 | 2  |   | 0 | 1 |
| Moreno | 24 | 2  |   | 0 | 2 |
| Moreno | 3  | 3  | 0 | 0 | 2 |
| Moreno | 7  | 7  | 1 | 0 | 2 |
| Moreno | 33 | 33 | 0 | 0 | 1 |
| Moreno | 52 | 52 | 1 | 0 | 1 |
| Moreno | 10 | 10 | 0 | 0 | 2 |
| Moreno | 10 | 10 | 0 | 0 | 1 |
| Moreno | 57 | 57 | 1 | 0 | 1 |
| Moreno | 60 | 60 | 1 | 0 | 2 |

|        |    |    |   |   |   |
|--------|----|----|---|---|---|
| Moreno | 62 | 16 | 1 | 0 | 2 |
| Moreno | 58 | 17 | 0 | 1 | 1 |
| Moreno | 62 | 62 | 1 | 1 | 2 |
| Moreno | 36 | 1  | 0 | 0 | 1 |
| Moreno | 30 | 12 | 1 | 1 | 2 |
| Moreno | 9  | 1  | 0 | 0 | 2 |
| Moreno | 34 | 2  | 1 | 0 | 1 |
| Moreno | 34 | 15 | 0 | 0 | 2 |
| Moreno | 17 | 16 | 0 | 0 | 1 |
| Moreno | 15 | 2  | 1 | 0 | 1 |
| Moreno | 9  | 2  | 1 | 0 | 2 |
| Moreno | 10 | 10 | 0 | 0 | 2 |
| Moreno | 9  | 9  | 0 | 0 | 2 |
| Moreno | 28 | 28 | 0 | 0 | 1 |
| Moreno | 15 | 15 | 0 | 0 | 2 |
| Moreno | 9  | 9  | 0 | 0 | 2 |
| Moreno | 49 | 17 | 1 | 0 | 1 |
| Moreno | 8  | 7  | 0 | 0 | 2 |
| Moreno | 1  | 1  |   | 0 | 2 |
| Moreno | 6  | 6  |   | 0 | 1 |
| Moreno | 41 | 12 | 0 | 0 | 1 |
| Moreno | 10 | 10 | 0 | 0 | 1 |
| Moreno | 11 | 11 | 1 | 1 | 2 |
| Moreno | 7  | 7  | 0 | 0 | 2 |
| Moreno | 15 | 12 | 0 | 0 | 2 |
| Moreno | 20 | 20 | 0 | 0 | 1 |
| Moreno | 22 | 20 | 1 | 1 | 2 |
| Moreno | 14 | 14 | 1 | 1 | 1 |
| Moreno | 52 | 8  | 0 | 0 | 1 |
| Moreno | 14 | 14 | 1 | 1 | 2 |
| Moreno | 12 | 12 | 1 | 1 | 1 |
| Moreno | 33 | 17 | 1 | 0 | 1 |
| Moreno | 14 | 14 | 0 | 0 | 1 |
| Moreno | 6  | 6  | 0 | 0 | 1 |
| Moreno | 14 | 14 |   | 0 | 1 |
| Moreno | 16 | 16 | 1 | 1 | 2 |
| Moreno | 24 | 24 | 0 | 0 | 1 |
| Moreno | 56 | 56 | 0 | 0 | 1 |
| Moreno | 5  | 5  | 0 | 0 | 1 |
| Moreno | 8  | 8  | 0 | 0 | 1 |
| Moreno | 12 | 12 | 1 | 1 | 2 |
| Moreno | 6  | 6  | 0 | 0 | 2 |
| Moreno | 6  | 6  | 0 | 0 | 2 |
| Moreno | 2  | 2  | 1 | 0 | 2 |
| Moreno | 12 | 12 | 0 | 0 | 1 |
| Moreno | 2  | 2  | 0 | 0 | 2 |
| Moreno | 61 | 59 | 0 | 0 | 1 |
| Moreno | 15 | 15 | 0 | 0 | 2 |
| Moreno | 62 | 6  | 0 | 0 | 1 |
| Moreno | 40 | 36 | 1 | 0 | 1 |

|          |    |    |   |   |   |
|----------|----|----|---|---|---|
| Moreno   | 28 | 6  | 1 | 0 | 2 |
| Moreno   | 19 | 19 | 1 | 1 | 2 |
| Moreno   | 79 | 77 | 1 | 0 | 2 |
| Vicencia | 60 | 50 | 0 | 1 | 2 |
| Vicencia | 55 | 55 | 0 | 1 | 1 |
| Vicencia | 53 | 53 | 1 | 1 | 1 |
| Vicencia | 67 | 67 | 0 | 0 | 1 |
| Vicencia | 71 | 61 | 1 | 1 | 1 |
| Vicencia | 57 | 57 | 1 | 1 | 1 |
| Vicencia | 44 | 44 | 1 | 1 | 1 |
| Vicencia | 65 | 65 | 0 | 0 | 1 |
| Vicencia | 60 | 60 | 0 | 0 | 2 |
| Vicencia | 10 | 10 | 0 | 1 | 1 |
| Vicencia | 9  | 9  | 0 | 0 | 2 |
| Vicencia | 56 | 55 | 1 | 0 | 2 |
| Vicencia | 33 | 33 | 1 | 1 | 1 |
| Vicencia | 57 | 57 | 1 | 1 | 1 |
| Vicencia | 30 | 30 | 1 | 1 | 1 |
| Vicencia | 23 | 23 | 1 | 1 | 1 |
| Vicencia | 20 | 20 | 0 | 0 | 1 |
| Vicencia | 47 | 10 | 0 | 0 | 1 |
| Vicencia | 25 | 25 | 0 | 0 | 1 |
| Vicencia | 21 | 21 | 0 | 0 | 1 |
| Vicencia | 26 | 26 | 1 | 1 | 1 |
| Vicencia | 28 | 28 | 0 | 0 | 1 |
| Vicencia | 8  | 8  | 0 | 0 | 2 |
| Vicencia | 10 | 10 | 1 | 1 | 2 |
| Vicencia | 27 | 27 | 0 | 0 | 1 |
| Vicencia | 31 | 31 | 0 | 0 | 1 |
| Vicencia | 8  | 8  | 1 | 1 | 2 |
| Vicencia | 7  | 7  | 0 | 1 | 1 |
| Vicencia | 10 | 10 | 1 | 0 | 2 |
| Vicencia | 29 | 29 | 1 | 0 | 1 |
| Vicencia | 35 | 35 | 1 | 1 | 1 |
| Vicencia | 32 | 32 | 0 | 0 | 1 |
| Vicencia | 5  | 5  | 0 | 0 | 1 |
| Vicencia | 14 | 14 | 1 | 1 | 1 |
| Vicencia | 13 | 13 | 1 | 1 | 2 |
| Vicencia | 1  | 1  | 0 | 0 | 2 |
| Vicencia | 33 | 33 | 1 | 1 | 1 |
| Vicencia | 7  | 7  | 1 | 0 | 1 |
| Vicencia | 17 | 12 | 1 | 1 | 1 |
| Vicencia | 3  | 3  | 0 | 0 | 2 |
| Vicencia | 59 | 59 | 1 | 1 | 1 |
| Vicencia | 33 | 33 | 1 | 1 | 1 |
| Vicencia | 32 | 32 | 0 | 0 | 1 |
| Vicencia | 52 | 40 | 1 | 1 | 1 |
| Vicencia | 4  | 4  | 0 | 0 | 2 |
| Vicencia | 13 | 13 | 1 | 0 | 1 |
| Vicencia | 14 | 14 | 1 | 1 | 2 |

|          |    |    |   |   |   |
|----------|----|----|---|---|---|
| Vicencia | 13 | 13 | 1 | 1 | 2 |
| Vicencia | 8  | 8  | 0 | 0 | 1 |
| Vicencia | 11 | 8  | 1 | 1 | 2 |
| Vicencia | 38 | 38 | 1 | 1 | 2 |
| Vicencia | 16 | 16 | 1 | 1 | 1 |
| Vicencia |    |    | 0 | 0 | 1 |
| Vicencia | 19 | 19 | 1 | 1 | 1 |
| Vicencia | 13 | 13 | 1 | 1 | 1 |
| Vicencia | 23 | 23 | 1 | 1 | 1 |
| Vicencia | 33 | 33 | 1 | 1 | 1 |
| Vicencia | 22 | 22 | 1 | 1 | 1 |
| Vicencia | 12 | 12 | 0 | 0 | 2 |
| Vicencia | 27 | 27 | 1 | 1 | 1 |
| Vicencia | 17 | 17 | 1 | 1 | 1 |
| Vicencia | 32 | 32 | 1 | 0 | 1 |
| Vicencia | 40 | 40 | 0 | 0 | 1 |
| Vicencia | 15 | 15 | 0 | 0 | 1 |
| Vicencia | 42 | 42 | 1 | 1 | 1 |
| Vicencia | 14 | 14 | 0 | 0 | 2 |
| Vicencia | 14 | 14 | 1 | 0 | 1 |
| Vicencia | 21 | 21 | 0 | 0 | 1 |
| Vicencia | 58 | 58 | 1 | 1 | 1 |
| Vicencia | 16 | 16 | 1 | 1 | 1 |
| Vicencia | 11 | 11 | 1 | 1 | 1 |
| Vicencia | 21 | 21 | 1 | 1 | 1 |
| Vicencia | 19 | 19 | 1 | 1 | 2 |
| Vicencia | 12 | 12 | 1 | 1 | 2 |
| Vicencia | 23 | 23 | 0 | 0 | 1 |
| Vicencia | 21 | 21 | 0 | 0 | 2 |
| Vicencia | 11 | 11 | 0 | 0 | 1 |
| Vicencia | 7  | 7  | 0 | 0 | 1 |
| Vicencia | 45 | 45 | 1 | 1 | 1 |
| Vicencia | 13 | 13 | 0 | 0 | 2 |
| Vicencia | 15 | 15 | 1 | 1 | 1 |
| Vicencia | 15 | 15 | 1 | 1 | 1 |
| Vicencia | 14 | 14 | 0 | 0 | 1 |
| Vicencia | 43 | 43 | 0 | 0 |   |
| Vicencia | 69 | 69 | 1 | 1 | 1 |
| Vicencia | 61 | 61 | 1 | 1 | 2 |
| Vicencia | 60 | 60 | 1 | 1 | 1 |
| Vicencia | 62 | 62 | 0 | 0 | 1 |
| Vicencia | 43 | 43 | 1 | 1 | 1 |
| Vicencia | 6  | 6  | 0 | 0 | 1 |
| Vicencia | 37 | 37 | 0 | 0 | 2 |
| Vicencia | 17 | 17 | 1 | 0 | 1 |
| Vicencia | 16 | 16 | 1 | 0 | 2 |
| Vicencia | 35 | 35 | 0 | 0 | 1 |
| Vicencia | 18 | 18 | 0 | 0 | 1 |
| Vicencia | 34 | 34 | 0 | 0 | 1 |
| Vicencia | 32 | 3  | 0 | 0 | 2 |

|          |    |    |   |   |   |
|----------|----|----|---|---|---|
| Vicencia | 61 | 61 | 0 | 0 | 2 |
| Vicencia | 48 | 48 | 0 | 0 | 2 |
| Vicencia | 48 | 48 | 0 | 0 | 1 |
| Vicencia | 30 | 20 | 1 | 1 | 1 |
| Vicencia | 11 | 11 | 1 | 1 | 2 |
| Vicencia | 55 | 55 | 0 | 0 | 1 |
| Vicencia | 30 | 30 | 1 | 1 | 1 |
| Vicencia | 8  | 8  | 1 | 1 | 1 |
| Vicencia | 13 | 13 | 1 | 0 | 2 |
| Vicencia | 42 | 11 | 1 | 1 | 2 |
| Vicencia | 28 | 25 | 1 | 0 | 1 |
| Vicencia | 11 | 11 | 1 | 1 | 2 |
| Vicencia | 34 | 34 | 0 | 0 | 1 |
| Vicencia | 37 | 7  | 1 | 1 | 1 |
| Vicencia | 35 | 35 | 1 | 1 | 2 |
| Vicencia | 38 | 15 | 1 | 1 | 1 |
| Vicencia | 63 | 63 | 1 | 1 | 2 |
| Vicencia | 9  | 9  | 0 | 0 | 1 |
| Vicencia | 25 | 1  | 0 | 0 | 1 |
| Vicencia | 37 | 15 | 0 | 0 | 1 |
| Vicencia | 19 | 19 | 1 | 1 | 2 |
| Vicencia | 37 | 37 | 0 | 0 | 2 |
| Vicencia | 8  | 8  | 0 | 0 | 2 |
| Vicencia | 34 | 34 | 0 | 0 | 1 |
| Vicencia | 10 | 10 | 0 | 0 | 2 |
| Vicencia | 43 | 43 | 1 | 1 | 1 |
| Vicencia | 18 | 18 | 0 | 0 | 2 |
| Vicencia | 14 | 14 | 1 | 1 | 2 |
| Vicencia | 28 | 28 | 0 | 0 | 2 |
| Vicencia | 19 | 19 | 1 | 1 | 1 |
| Vicencia | 18 | 18 | 1 | 0 | 2 |
| Vicencia | 16 | 16 | 0 | 0 | 2 |
| Vicencia | 52 | 52 | 1 | 1 | 2 |
| Vicencia | 28 | 28 | 1 | 1 | 2 |
| Vicencia | 13 | 3  | 0 | 0 | 2 |
| Vicencia | 15 | 15 | 1 | 1 | 1 |
| Vicencia | 16 | 16 | 1 | 1 | 1 |
| Vicencia | 30 | 30 |   | 0 | 2 |
| Vicencia | 17 | 17 |   | 0 | 2 |
| Vicencia | 14 | 14 | 0 | 0 | 1 |
| Vicencia | 12 | 12 | 0 | 0 | 1 |
| Vicencia | 14 | 14 | 0 | 1 | 1 |
| Vicencia | 38 | 38 | 0 | 0 | 1 |
| Vicencia | 69 | 69 | 1 | 1 | 2 |
| Vicencia | 27 | 27 | 1 | 1 | 2 |
| Vicencia | 19 | 19 | 0 | 0 | 1 |
| Vicencia | 28 | 28 | 0 | 0 | 1 |
| Vicencia | 21 | 21 | 1 | 1 | 1 |
| Vicencia | 18 | 18 | 1 | 1 | 1 |
| Vicencia | 27 | 27 | 1 | 1 | 1 |



|          |    |    |   |   |   |
|----------|----|----|---|---|---|
| Vicencia | 11 | 11 | 1 | 1 | 2 |
| Vicencia | 12 | 12 | 1 | 0 | 2 |
| Vicencia | 10 | 10 | 0 | 0 | 2 |
| Vicencia | 33 | 30 | 1 | 0 | 2 |
| Vicencia | 49 | 49 | 1 | 1 | 2 |
| Vicencia | 40 | 40 | 1 | 0 | 2 |
| Vicencia | 25 | 25 | 1 | 1 | 1 |
| Vicencia | 5  | 5  | 1 | 1 | 1 |
| Vicencia | 9  | 9  | 1 | 1 | 1 |
| Vicencia | 14 | 14 | 1 | 1 | 2 |
| Vicencia | 12 | 12 | 1 | 0 | 2 |
| Vicencia | 27 | 27 | 0 | 0 | 1 |
| Vicencia | 59 | 59 | 1 | 1 | 1 |
| Vicencia | 17 | 17 | 1 | 1 | 1 |
| Vicencia | 14 | 14 | 1 | 0 | 2 |
| Vicencia | 35 | 35 | 1 | 1 | 1 |
| Vicencia | 9  | 9  | 1 | 0 | 1 |
| Vicencia | 61 | 61 | 0 | 0 | 1 |
| Vicencia | 41 | 22 | 0 | 0 | 1 |
| Vicencia | 34 | 34 | 1 | 1 | 2 |
| Vicencia | 37 | 37 | 1 | 1 | 2 |
| Vicencia | 44 | 44 | 1 | 1 | 2 |
| Vicencia | 44 | 44 | 0 | 0 | 1 |
| Vicencia | 38 | 38 | 0 | 0 | 1 |
| Vicencia | 12 | 12 | 0 | 0 | 1 |
| Vicencia | 6  | 6  | 0 | 1 | 1 |
| Vicencia | 23 | 23 | 0 | 0 | 1 |
| Vicencia | 20 | 20 | 0 | 0 | 1 |
| Vicencia | 26 | 26 | 1 | 1 | 1 |
| Vicencia | 33 | 33 | 1 | 1 | 2 |
| Vicencia | 17 | 17 | 1 | 1 | 2 |
| Vicencia | 17 | 17 | 1 | 1 | 2 |
| Vicencia | 17 | 17 | 1 | 0 | 2 |
| Vicencia | 65 | 25 | 0 | 1 | 2 |
| Vicencia | 63 | 63 | 0 | 0 | 1 |
| Vicencia | 43 | 43 | 0 | 0 | 1 |
| Vicencia | 32 | 32 |   | 0 | 1 |
| Vicencia | 16 | 16 | 1 | 1 | 2 |
| Vicencia | 57 | 57 | 1 | 0 | 1 |
| Vicencia | 16 | 16 | 0 | 0 | 2 |
| Vicencia | 34 | 34 | 0 | 0 | 1 |
| Vicencia | 9  | 9  | 0 | 0 | 1 |
| Vicencia | 21 | 21 | 0 | 0 | 1 |
| Vicencia | 17 | 17 | 1 | 1 | 2 |
| Vicencia | 48 | 48 | 1 | 1 | 2 |
| Vicencia | 39 | 39 | 1 | 1 | 1 |
| Vicencia | 18 | 18 | 1 | 0 | 2 |
| Vicencia | 27 | 27 | 0 | 0 | 2 |
| Vicencia | 30 | 30 | 0 | 0 | 1 |
| Vicencia | 28 | 28 | 0 | 0 | 1 |

|          |    |    |   |   |   |
|----------|----|----|---|---|---|
| Vicencia | 54 | 54 | 0 | 0 | 1 |
| Vicencia | 27 | 27 | 1 | 1 | 2 |
| Vicencia | 9  | 9  | 1 | 1 | 1 |
| Vicencia | 10 | 10 |   | 0 | 1 |
| Vicencia | 10 | 10 | 1 | 1 | 2 |
| Vicencia | 37 | 37 | 1 | 1 | 2 |
| Vicencia | 41 | 41 | 1 | 1 | 1 |
| Vicencia | 26 | 26 |   | 0 | 1 |
| Vicencia | 15 | 15 | 0 | 0 | 1 |
| Vicencia | 60 | 60 | 0 | 0 | 1 |
| Vicencia | 31 | 31 | 1 | 1 | 1 |
| Vicencia | 33 | 33 | 1 | 1 | 1 |
| Vicencia | 45 | 45 |   | 0 | 2 |
| Vicencia | 20 | 20 | 1 | 1 | 1 |
| Vicencia | 9  | 9  | 1 | 1 | 2 |
| Vicencia |    |    | 1 | 1 | 2 |
| Vicencia | 9  | 9  | 0 | 0 | 2 |
| Vicencia | 38 | 38 | 1 | 1 | 1 |
| Vicencia | 39 | 39 |   | 0 | 1 |
| Vicencia | 31 | 31 | 0 | 0 | 1 |
| Vicencia | 3  | 3  | 0 | 0 | 1 |
| Vicencia | 7  | 7  | 0 | 0 | 1 |
| Vicencia | 35 | 35 | 1 | 1 | 1 |
| Vicencia | 8  | 8  | 1 | 1 | 2 |
| Vicencia | 14 | 14 | 1 | 1 | 1 |
| Vicencia | 64 | 10 | 1 | 1 | 2 |
| Vicencia | 46 | 46 | 1 | 1 | 2 |
| Vicencia | 37 | 37 | 0 | 0 | 2 |
| Vicencia | 54 | 54 | 1 | 1 | 2 |
| Vicencia | 33 | 33 | 1 | 1 | 1 |
| Vicencia | 4  | 4  | 0 | 0 | 1 |
| Vicencia | 5  | 5  | 0 | 0 | 1 |
| Vicencia | 5  | 5  | 0 | 0 | 1 |
| Vicencia | 11 | 11 | 1 | 1 | 1 |
| Vicencia | 8  | 8  | 1 | 0 | 1 |
| Vicencia | 11 | 11 | 0 | 0 | 2 |
| Vicencia | 15 | 15 | 1 | 0 | 2 |
| Vicencia | 53 | 53 | 1 | 0 | 1 |
| Vicencia | 39 | 39 | 1 | 0 | 2 |
| Vicencia | 12 | 12 | 0 | 0 | 1 |
| Vicencia | 11 | 11 | 1 | 1 | 2 |
| Vicencia | 12 | 12 | 1 | 1 | 1 |
| Vicencia | 13 | 12 | 1 | 1 | 1 |
| Vicencia | 15 | 15 | 0 | 0 | 1 |
| Vicencia | 14 | 14 | 0 | 0 | 1 |
| Vicencia | 9  | 9  | 1 | 1 | 2 |
| Vicencia | 13 | 13 |   | 1 | 1 |
| Vicencia | 13 | 13 | 0 | 0 | 2 |
| Vicencia | 16 | 16 | 1 | 1 | 1 |
| Vicencia | 18 | 18 | 1 | 1 | 1 |

|          |    |    |   |   |   |
|----------|----|----|---|---|---|
| Vicencia | 19 | 19 | 1 | 0 |   |
| Vicencia | 30 | 30 | 1 | 1 | 2 |
| Vicencia | 57 | 57 | 1 | 1 | 2 |
| Vicencia | 60 | 30 | 1 | 1 | 2 |
| Vicencia | 18 | 18 | 0 | 0 | 1 |
| Vicencia | 5  | 5  | 0 | 0 | 1 |
| Vicencia | 2  | 2  | 0 | 0 | 1 |
| Vicencia | 46 | 46 | 1 | 1 | 1 |
| Vicencia | 9  | 9  |   | 0 | 2 |
| Vicencia | 41 | 41 | 0 | 0 | 1 |
| Vicencia | 15 | 15 | 0 | 0 | 2 |
| Vicencia | 30 | 30 |   | 0 | 2 |
| Vicencia | 23 | 23 | 0 | 0 | 1 |
| Vicencia | 9  | 9  | 0 | 0 | 1 |
| Vicencia | 30 | 30 | 0 | 0 | 2 |
| Vicencia | 56 | 56 | 1 | 1 | 1 |
| Vicencia | 13 | 13 | 1 | 1 | 1 |
| Vicencia | 16 | 16 |   | 0 | 1 |
| Vicencia | 9  | 9  | 0 | 0 | 2 |
| Vicencia | 22 | 22 | 0 | 0 | 2 |
| Vicencia | 60 | 60 | 1 | 1 | 2 |
| Vicencia | 28 | 28 | 0 | 0 | 2 |
| Vicencia | 39 | 39 | 1 | 1 | 2 |
| Vicencia | 38 | 3  | 0 | 0 | 1 |
| Vicencia | 11 | 11 | 0 | 0 | 2 |
| Vicencia | 8  | 3  | 0 | 0 | 1 |
| Vicencia | 12 | 12 | 1 | 1 | 1 |
